**Stephen M. Rupp, M.D.,\* Jeffrey L. Apfelbaum, M.D., Richard T. Connis, Ph.D., David G. Nickinovich, Ph.D.; on behalf of the American Society of Anesthesiologists Task Force on Central Venous Access.** \*Virginia Mason Medical Center, Seattle, Washington. stephen.rupp@vmcc.org

## References

1. American Society of Anesthesiologists Task Force on Central Venous Access, Rupp SM, Apfelbaum JL, Blitt C, Caplan RA, Connis RT, Domino KB, Fleisher LA, Grant S, Mark JB, Morray JP, Nickinovich DG, Tung A: Practice guidelines for central venous access: A report by the American Society of Anesthesiologists Task Force on Central Venous Access. *ANESTHESIOLOGY* 2012; 116: 539-73
2. Cajazzo M, Quintini G, Cocchiera G, Greco G, Vaglica R, Pezzano G, Barbera V, Modica G: Comparison of central venous catheterization with and without ultrasound guide. *Transfus Apher Sci* 2004; 31:199-202
3. Karakitsos D, Labropoulos N, De Groot E, Patrianakos AP, Kouraklis G, Poularas J, Samonis G, Tsoutsos DA, Konstadoulakis MM, Karabinis A: Real-time ultrasound-guided catheterization of the internal jugular vein: A prospective comparison with the landmark technique in critical care patients. *Crit Care* 2006; 10:R162
4. Wigmore TJ, Smythe JF, Hacking MB, Raobaikady R, MacCallum NS: Effect of the implementation of NICE guidelines for ultrasound guidance on the complication rates associated with central venous catheter placement in patients presenting for routine surgery in a tertiary referral centre. *Br J Anaesth* 2007; 99:662-5
5. Augoustides JG, Horak J, Ochroch AE, Vernick WJ, Gambone AJ, Weiner J, Pinchasik D, Kowalchuk D, Savino JS, Jobes DR: A randomized controlled clinical trial of real-time needle-guided ultrasound for internal jugular venous cannulation in a large university anesthesia department. *J Cardiothorac Vasc Anesth* 2005; 19:310-5
6. Brederlau J, Greim C, Schwemmer U, Haunschmid B, Markus C, Roewer N: Ultrasound-guided cannulation of the internal jugular vein in critically ill patients positioned in 30 degrees dorsal elevation. *Eur J Anaesthesiol* 2004; 21:684-7
7. Hatfield A, Bodenham A: Portable ultrasound for difficult central venous access. *Br J Anaesth* 1999; 82:822-6
8. Lamperti M, Cortellazzi P, D'Onofrio G, Subert M, Falcone C, Filippini G, Caldiroli D: An outcome study on complications using routine ultrasound assistance for internal jugular vein cannulation. *Acta Anaesthesiol Scand* 2007; 51:1327-30
9. Troianos CA, Kuwik RJ, Pasqual JR, Lim AJ, Odasso DP: Internal jugular vein and carotid artery anatomic relation as determined by ultrasonography. *ANESTHESIOLOGY* 1996; 85:43-8
10. Gordon AC, Saliken JC, Johns D, Owen R, Gray RR: US-guided puncture of the internal jugular vein: Complications and anatomic considerations. *J Vasc Interv Radiol* 1998; 9:333-8
11. Maecken T, Grau T: Ultrasound imaging in vascular access. *Crit Care Med* 2007; 35(5 Suppl):S178-85
12. Lichtenstein D, Saïfi R, Augarde R, Prin S, Schmitt JM, Page B, Pipien I, Jardin F: The Internal jugular veins are asymmetric. Usefulness of ultrasound before catheterization. *Intensive Care Med* 2001; 27:301-5
13. Turba UC, Uflacker R, Hannegan C, Selby JB: Anatomic relationship of the internal jugular vein and the common carotid artery applied to percutaneous transjugular procedures. *Cardiovasc Intervent Radiol* 2005; 28:303-6
14. Troianos CA, Hartman GS, Glas KE, Skubas NJ, Eberhardt RT, Walker JD, Reeves ST, Councils on Intraoperative Echocardiography and Vascular Ultrasound of the American Society of Echocardiography: Guidelines for performing ultrasound guided vascular cannulation: Recommendations of the American Society of Echocardiography and the Society of Cardio-

vascular Anesthesiologists. *J Am Soc Echocardiogr* 2011; 24:1291-318

15. Rothchild, JM: Ultrasound guidance of central vein catheterization. In: *Making Health Care Safer: A critical analysis of patient safety practices*. Rockville: AHRQ Publications; 2001: 245-55
16. National Institute for Clinical Excellence (NICE): *Guidance on the Use of Ultrasound Locating Devices for Placing Central Venous Catheters*. London: NICE; 2002

(Accepted for publication June 27, 2012.)

## Alternatives to Preoperative Transfusion Should Be Preferred in Anemic Cardiac Surgical Patients Instead of Useless Transfusion

*To the Editor:*

We read with great interest the recent article published by Karkouti *et al.* about prophylactic erythrocyte transfusion in anemic patients scheduled for cardiac surgery.<sup>1</sup> We are very concerned by the concept of “prophylactic packed erythrocyte transfusion” before elective surgery.

The authors stated “this pilot study showed that in anemic cardiac surgical patients, prophylactic transfusion of 2 units of erythrocytes 1 to 2 days before surgery safely reduces perioperative anemia and erythrocyte transfusions, and may reduce plasma iron level.”

This statement is not in accordance with the title of the article. More importantly, it is not supported by the data presented.

On the one hand, the study was not powered to assess the safety of prophylactic transfusion in this population. According to the reported incidence of immediate complications associated with packed erythrocytes transfusion, a much higher number of patients had to be studied. As estimated by the authors, inclusion of 1,000 patients should be necessary to show a statistically significant improvement in renal function. With this larger population, side effects associated with erythrocyte transfusion might appear. These side effects may have potentially severe consequences for patients' outcome, especially if they have resulted in a report of the surgical intervention. Of note, the total number of erythrocyte units transfused in the perioperative period was not different between the two studied groups.

On the other hand, the statement that “the increase in postoperative iron and transferrin saturation levels was more pronounced in the control arm than in the treatment arm” could not be inferred from the statistical analysis used. Indeed, a two-way ANOVA test should have been performed to demonstrate an interaction between “group” and “time” effects. Moreover, as observed in the treatment arm, transferrin saturation levels may increase after cardiac surgery because of several other factors that have to be taken into account.

It is increasingly recognized that preoperative anemia and perioperative transfusion are both independently associated

with increased postoperative morbidity in cardiac surgery patients.<sup>2,3</sup> Several alternatives have been proposed to treat preoperative anemia and to reduce intra- and postoperative transfusion, in particular intravenous iron and erythropoietin. In the subpopulation of patients in which iron status was evaluated, most patients in both groups exhibited preoperative functional iron deficit (*i.e.*, transferring saturation level less than 20%) that might have been corrected before surgery. The 2011 Updated Society of Thoracic Surgery and Society of Cardiovascular Anesthesiologists Blood Conservation Clinical Practice Guidelines stated that it is reasonable to use preoperative iron and erythropoietin several days before cardiac surgery to increase erythrocyte mass in patients with preoperative anemia (Class IIa recommendation).<sup>4</sup>

Although preoperative hemoglobin optimization requires some delay, which could not fit with the surgical schedule, several authors showed that even a very short preoperative erythropoietin administration seems to be a safe and easy method to reduce the need for erythrocyte transfusions in cardiac surgery patients.<sup>5,6</sup> In particular, Yoo *et al.* showed very recently that a single intravenous administration of erythropoietin and iron supplementation 1 day before surgery significantly reduced the intra- and postoperative transfusion requirement in anemic patients undergoing valvular heart surgery.<sup>7</sup> Even if the benefit to risk balance might be confirmed in a large multicenter randomized controlled trial, a combination of iron and erythropoietin appears to be an interesting alternative for preoperative anemia correction.

Regarding the management of cardiopulmonary bypass (CPB), the association between lowest hematocrit on CPB and adverse renal outcomes has been well demonstrated.<sup>8</sup> However, maintenance of oxygen delivery to the tissues and in particular to the kidneys can be maintained by other treatments than packed erythrocytes transfusion. Ranucci *et al.* showed that the detrimental effect of a high hemodilution degree during CPB could be significantly reduced by increasing the oxygen delivery, notably to the kidneys, with an increased pump flow.<sup>9</sup> This increase in pump flow can be achieved without significant increases in shear stress with the modern CPB circuitry, in particular the arterial line. In addition, ultrafiltration of the priming volume has been shown to be an efficient technique to reduce the degree of hemodilution during CPB.<sup>4</sup>

Finally, although the total number of erythrocytes units transfused in both groups throughout the studied period was not different between the two, the authors did not report if some patients in the control group were finally not transfused. If this was the case, then it implies that some patients in the “prophylactic” transfusion group might have been transfused unnecessarily.

In conclusion, the article published by Karkouti *et al.*<sup>1</sup> has to be interpreted with great caution. Based on the results presented, preoperative erythrocyte could not be considered as a strategy to decrease perioperative transfusion. A multimodal pre- and intraoperative approach should have been

preferred, and the effects of such strategies on patient postoperative outcome remain to be demonstrated through a large randomized controlled multicenter trial.

**David Faraoni, M.D., Yannick Ciccarella, M.D., Philippe Van der Linden, M.D., Ph.D.\*** \*Centre Hospitalier Universitaire Brugmann, Brussels, Belgium. philippe.vanderlinden@chu-brugmann.be

## References

1. Karkouti K, Wijeyesundera DN, Yau TM, McCluskey SA, Chan CT, Wong PY, Crowther MA, Hozhabri S, Beattie WS: Advance targeted transfusion in anemic cardiac surgical patients for kidney protection: An unblinded randomized pilot clinical trial. *ANESTHESIOLOGY* 2012; 116:613-21
2. Kulier A, Levin J, Moser R, Rumpold-Seitlinger G, Tudor IC, Snyder-Ramos SA, Moehnle P, Mangano DT, Investigators of the Multicenter Study of Perioperative Ischemia Research Group, Ischemia Research and Education Foundation: Impact of preoperative anemia on outcome in patients undergoing coronary artery bypass graft surgery. *Circulation* 2007; 116: 471-9
3. Hajjar LA, Vincent JL, Galas FR, Nakamura RE, Silva CM, Santos MH, Fukushima J, Kalil Filho R, Sierra DB, Lopes NH, Mauad T, Roquim AC, Sundin MR, Leão WC, Almeida JP, Pomerantzeff PM, Dallan LO, Jatene FB, Stolf NA, Auler JO Jr: Transfusion requirements after cardiac surgery: The TRACS randomized controlled trial. *JAMA* 2010; 304:1559-67
4. Society of Thoracic Surgeons Blood Conservation Guideline Task Force, Ferraris VA, Brown JR, Despotis GJ, Hammon JW, Reece TB, Saha SP, Song HK, Clough ER: Society of Cardiovascular Anesthesiologists Special Task Force on Blood Transfusion, Shore-Lesserson LJ, Goodnough LT, Mazer CD, Shander A, Stafford-Smith M, Waters J; International Consortium for Evidence Based Perfusion, Baker RA, Dickinson TA, FitzGerald DJ, Likosky DS, Shann KG: 2011 update to the Society of Thoracic Surgeons and the Society of Cardiovascular Anesthesiologists blood conservation clinical practice guidelines. *Ann Thorac Surg* 2011; 91:944-82
5. Emmert MY, Salzberg SP, Theusinger OM, Felix C, Plass A, Hoerstrup SP, Falk V, Gruenenfelder J: How good patient blood management leads to excellent outcomes in Jehovah's witness patients undergoing cardiac surgery. *Interact Cardiovasc Thorac Surg* 2011; 12:183-8
6. Weltert L, D'Alessandro S, Nardella S, Girola F, Bellisario A, Maselli D, De Paulis R: Preoperative very short-term, high-dose erythropoietin administration diminishes blood transfusion rate in off-pump coronary artery bypass: A randomized blind controlled study. *J Thorac Cardiovasc Surg* 2010; 139:621-7
7. Yoo YC, Shim JK, Kim JC, Jo YY, Lee JH, Kwak YL: Effect of single recombinant human erythropoietin injection on transfusion requirements in preoperatively anemic patients undergoing valvular heart surgery. *ANESTHESIOLOGY* 2011; 115: 929-37
8. Karkouti K, Wijeyesundera DN, Yau TM, McCluskey SA, Chan CT, Wong PY, Beattie WS: Influence of erythrocyte transfusion on the risk of acute kidney injury after cardiac surgery differs in anemic and nonanemic patients. *ANESTHESIOLOGY* 2011; 115:523-30
9. Ranucci M, Romitti F, Isgrò G, Cotza M, Brozzi S, Boncilli A, Ditta A: Oxygen delivery during cardiopulmonary bypass and acute renal failure after coronary operations. *Ann Thorac Surg* 2005; 80:2213-20

(Accepted for publication June 13, 2012.)
